# Supplementary material for: [MeNC5H5]2[TCNE]2 (TCNE = tetracyanoethylene). Single crystal X-ray and neutron diffraction characterization of an exceptionally long 2.8 Å C–C bond
Source: Royal Society of Chemistry journal article supplement (doi:10.1039/b816817b), 2009-01-01
Supplement: b816817b.pdf [file b816817b.pdf]

**[MeNC<sub>5</sub>H<sub>5</sub>]<sub>2</sub>[TCNE]<sub>2</sub> (TCNE = tetracyanoethylene).**  
**Single Crystal X-Ray and Neutron Diffraction Characterization of**  
**an Exceptionally Long 2.8 Å C-C Bond**

Paula M. B. Piccoli, Arthur J. Schultz, Hazel A. Sparkes, Judith A. K. Howard,

Atta M. Arif, Louise N. Dawe, Joel S. Miller

Intense Pulsed Neutron Source, Argonne National Laboratory, Argonne, IL 60439-4814 USA,

University of Durham, Department of Chemistry, South Road, Durham DH1 3LE, UK, and the

University of Utah, 315 S. 1400 E. RM 2124 Salt Lake City, UT 84112-0850 USA

Supporting Information

Table S1. Intra [TCNE]<sub>2</sub><sup>2-</sup> bond distances (Å) and torsion angles (°) for [Mepy]<sub>2</sub>[TCNE]<sub>2</sub> as determined by neutron diffraction at 50 K.

Table S2. Intermolecular contacts between methyl pyridine H and TCNE N atoms less than 3 Å for [Mepy]<sub>2</sub>[TCNE]<sub>2</sub> as determined by neutron diffraction

Table S1. Intra [TCNE]<sub>2</sub><sup>2-</sup> bond distances (Å) and torsion angles (°) for [Mepy]<sub>2</sub>[TCNE]<sub>2</sub> as determined by neutron diffraction at 50 K.

| Atoms        | Angle, °   | Distance, Å |
|--------------|------------|-------------|
| C2 – C2      |            | 3.157(5)    |
| C4 – C4      |            | 3.126(5)    |
| C2 – C4_2    |            | 2.801(4)    |
| C2'-C4-C2-C1 | 96.70(25)  |             |
| C2'-C4-C2-C3 | -96.72(26) |             |
| C4'-C2-C4-C5 | 93.14(25)  |             |
| C4'-C4-C2-C6 | -          |             |
|              | 100.27(25) |             |

Table S2. Intermolecular contacts between methyl pyridine H and TCNE N atoms less than 3 Å for [Mepy]<sub>2</sub>[TCNE]<sub>2</sub>, as determined by neutron diffraction at 50 K.

| Atoms    | Distance | Atoms     | Distance  |
|----------|----------|-----------|-----------|
|          | e        |           |           |
| H7 - N1  | 2.913(6) | H11 - N3  | 2.910(7)  |
| H7 - N4  | 2.774(7) | H12a - N1 | 2.882(9)  |
| H8 - N1  | 2.524(7) | H12a - N3 | 2.630(8)  |
| H8 - N4  | 2.757(6) | H12b - N4 | 2.949(9)  |
| H9 - N2  | 2.454(7) | H12c - N2 | 2.913(11) |
|          |          | )         |           |
| H9 - N4  | 2.650(7) | H12c - N4 | 2.895(9)  |
| H10 - N2 | 2.597(7) |           |           |
